# Supplementary material
Source: Springer Nature journal article supplement (https://www.springermedizin.de/resource/supplementary/12937_2006_138_MOESM1_ESM.pdf/25654476)

ml/kg/min

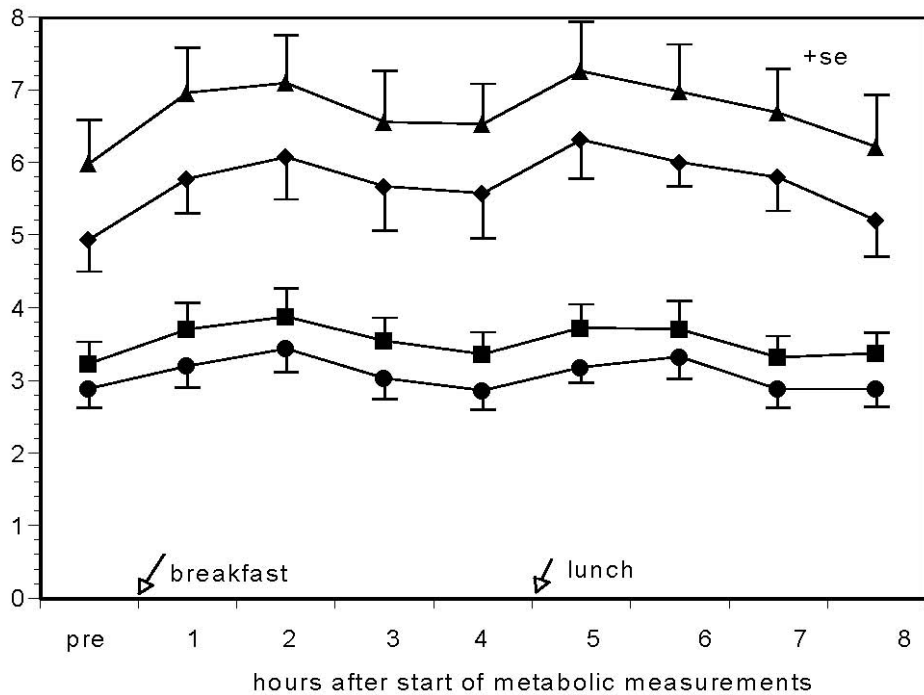

VO<sub>2</sub>

VCO<sub>2</sub>

Supplement: MOESM1 [file 25654476]
